# Supplementary material for: A broadband cavity-enhanced spectrometer for atmospheric trace gas measurements and Rayleigh scattering cross sections in the cyan region (470–540 nm)
Source: Copernicus journal article supplement (doi:10.5194/amt-2018-297), 2018-09-10
Supplement: Supplementary file 1 [file amt-2018-297-supplement.zip]

Archive with 2 entries (2 files):
- AMTD CEAS supplement 180902.pdf
- Rayleigh Scattering Cross Sections.xlsx
