# Supplementary material for: A broadband cavity-enhanced spectrometer for atmospheric trace gas measurements and Rayleigh scattering cross sections in the cyan region (470–540 nm)
Source: Copernicus journal article supplement (doi:10.5194/amt-2018-297), 2018-09-10
Supplement: Supplementary file 1 [file Rayleigh Scattering Cross Sections.xlsx]

## Sheet: Sheet1
Wavelength	σRay (N2)	σRay (Ar)	σTot (Air)	σTot (O2)	σRay (CO2)	σTot (CH4)
480.038	8.20042e-27	6.85347e-27	8.88107e-27	1.44483e-26	1.99694e-26	1.89897e-26
480.119	8.19322e-27	6.85005e-27	8.911e-27	1.39195e-26	1.98016e-26	1.86325e-26
480.2	8.1498e-27	6.87698e-27	8.84366e-27	1.37061e-26	1.96337e-26	1.84928e-26
480.28	8.27947e-27	6.76029e-27	8.82688e-27	1.36804e-26	1.98365e-26	1.87476e-26
480.361	8.09584e-27	6.90369e-27	8.63025e-27	1.32279e-26	1.9396e-26	1.83062e-26
480.442	8.07085e-27	6.9155e-27	8.49249e-27	1.26836e-26	1.91071e-26	1.79902e-26
480.522	8.04798e-27	6.9256e-27	8.49114e-27	1.26165e-26	1.90873e-26	1.80299e-26
480.603	8.04357e-27	6.91988e-27	8.50715e-27	1.25107e-26	1.91678e-26	1.81287e-26
480.684	8.06635e-27	6.89091e-27	8.55566e-27	1.2513e-26	1.9954e-26	1.87707e-26
480.764	8.13396e-27	6.82441e-27	8.59731e-27	1.25966e-26	2.04413e-26	1.93417e-26
480.845	8.16056e-27	6.79291e-27	8.59977e-27	1.24155e-26	1.99673e-26	1.92439e-26
480.925	8.15431e-27	6.78878e-27	8.55146e-27	1.18117e-26	1.93415e-26	1.88048e-26
481.006	8.06308e-27	6.85597e-27	8.48351e-27	1.15142e-26	1.9123e-26	1.87265e-26
481.087	7.93891e-27	6.95342e-27	8.45711e-27	1.15034e-26	1.95089e-26	1.89663e-26
481.167	8.11082e-27	6.79707e-27	8.64217e-27	1.14977e-26	1.96265e-26	1.9257e-26
481.248	8.10375e-27	6.79367e-27	8.66105e-27	1.14123e-26	1.94923e-26	1.94194e-26
481.328	7.9944e-27	6.87693e-27	8.41071e-27	1.11121e-26	1.94782e-26	1.93861e-26
481.409	8.04096e-27	6.82785e-27	8.33169e-27	1.10498e-26	1.94824e-26	1.95308e-26
481.49	7.8802e-27	6.95728e-27	8.41055e-27	1.08058e-26	1.93464e-26	1.95546e-26
481.57	8.0186e-27	6.82812e-27	8.42897e-27	1.07907e-26	1.94285e-26	1.9696e-26
481.651	8.0072e-27	6.82847e-27	8.49786e-27	1.0623e-26	1.93257e-26	1.95831e-26
481.731	7.95855e-27	6.86071e-27	8.48277e-27	1.03883e-26	1.91518e-26	1.94577e-26
481.812	7.9932e-27	6.82171e-27	8.44906e-27	1.02855e-26	1.92257e-26	1.95178e-26
481.892	8.01088e-27	6.79739e-27	8.44475e-27	1.00827e-26	1.90063e-26	1.95511e-26
481.973	7.95644e-27	6.83443e-27	8.3837e-27	9.96436e-27	1.89056e-26	1.95454e-26
482.053	7.94705e-27	6.83314e-27	8.26787e-27	9.85305e-27	1.87143e-26	1.95751e-26
482.134	7.96172e-27	6.81127e-27	8.28625e-27	9.7979e-27	1.87581e-26	1.96464e-26
482.214	7.96005e-27	6.8034e-27	8.28465e-27	9.73527e-27	1.87479e-26	1.99455e-26
482.295	8.02231e-27	6.74152e-27	8.32551e-27	9.77448e-27	1.92074e-26	2.02116e-26
482.375	7.96369e-27	6.78175e-27	8.40169e-27	9.57989e-27	1.9205e-26	2.02088e-26
482.456	7.91747e-27	6.81194e-27	8.35533e-27	9.53887e-27	1.97159e-26	2.04005e-26
482.536	7.96436e-27	6.7627e-27	8.41582e-27	9.31993e-27	1.97125e-26	2.0371e-26
482.617	7.96727e-27	6.75103e-27	8.41923e-27	9.15491e-27	1.97091e-26	2.03185e-26
482.697	7.89976e-27	6.79929e-27	8.36137e-27	9.08223e-27	1.942e-26	2.03129e-26
482.778	7.84441e-27	6.83783e-27	8.29336e-27	8.92019e-27	1.91449e-26	2.01673e-26
482.858	7.89182e-27	6.78759e-27	8.20225e-27	8.70332e-27	1.89668e-26	1.99673e-26
482.938	7.90368e-27	6.7682e-27	8.25487e-27	8.64257e-27	1.88764e-26	2.0006e-26
483.019	7.91547e-27	6.74895e-27	8.17099e-27	8.65489e-27	1.90856e-26	2.01351e-26
483.099	7.93166e-27	6.72604e-27	8.18837e-27	8.60113e-27	1.88865e-26	2.0258e-26
483.18	7.83616e-27	6.79854e-27	8.15348e-27	8.40697e-27	1.88128e-26	2.04878e-26
483.26	7.92108e-27	6.71669e-27	8.26043e-27	8.40537e-27	1.91903e-26	2.09579e-26
483.341	7.85554e-27	6.76337e-27	8.13799e-27	8.35831e-27	1.881e-26	2.07754e-26
483.421	7.89733e-27	6.71853e-27	7.99516e-27	8.26116e-27	1.89213e-26	2.08798e-26
483.501	7.86878e-27	6.73367e-27	8.10362e-27	8.28383e-27	1.90937e-26	2.09414e-26
483.582	7.79255e-27	6.79016e-27	8.07307e-27	8.0187e-27	1.89084e-26	2.09405e-26
483.662	7.8511e-27	6.73048e-27	8.18797e-27	8.09787e-27	1.92398e-26	2.16733e-26
483.742	7.96366e-27	6.62659e-27	8.31334e-27	8.36636e-27	1.94481e-26	2.24417e-26
483.823	7.85557e-27	6.7084e-27	8.23692e-27	8.17574e-27	1.91275e-26	2.25495e-26
483.903	7.85831e-27	6.69696e-27	8.22313e-27	8.26414e-27	1.91924e-26	2.31678e-26
483.983	7.81418e-27	6.72556e-27	8.07088e-27	8.1986e-27	1.886e-26	2.33877e-26
484.064	7.82403e-27	6.708e-27	7.95849e-27	8.02431e-27	1.89131e-26	2.34439e-26
484.144	7.85428e-27	6.67316e-27	7.95884e-27	7.8974e-27	1.88006e-26	2.36289e-26
484.224	7.77789e-27	6.72941e-27	7.93731e-27	7.79771e-27	1.84565e-26	2.38913e-26
484.305	7.83462e-27	6.67173e-27	7.98968e-27	7.84263e-27	1.86935e-26	2.49683e-26
484.385	7.88831e-27	6.61747e-27	8.07708e-27	7.86665e-27	1.91264e-26	2.61755e-26
484.465	7.87043e-27	6.62347e-27	7.9863e-27	7.8195e-27	1.90272e-26	2.69128e-26
484.546	7.7904e-27	6.68228e-27	8.00131e-27	7.75064e-27	1.9003e-26	2.78185e-26
484.626	7.89955e-27	6.58127e-27	8.1731e-27	7.9187e-27	1.90714e-26	2.90629e-26
484.706	7.94873e-27	6.53182e-27	8.2287e-27	7.90293e-27	1.96633e-26	3.01391e-26
484.786	7.88215e-27	6.57792e-27	8.23778e-27	7.83973e-27	1.96238e-26	3.00079e-26
484.867	7.90063e-27	6.5537e-27	8.1965e-27	7.63257e-27	1.9339e-26	2.92373e-26
484.947	7.83539e-27	6.59917e-27	8.15917e-27	7.5522e-27	1.907e-26	2.85578e-26
485.027	7.84625e-27	6.58116e-27	8.06302e-27	7.68536e-27	1.89541e-26	2.80435e-26
485.107	7.83131e-27	6.58476e-27	8.14288e-27	7.72884e-27	1.91574e-26	2.75605e-26
485.188	7.73611e-27	6.65657e-27	8.04022e-27	7.48619e-27	1.86953e-26	2.62777e-26
485.268	7.74886e-27	6.63667e-27	7.99981e-27	7.47717e-27	1.89253e-26	2.58783e-26
485.348	7.81059e-27	6.57546e-27	7.98846e-27	7.70288e-27	1.86876e-26	2.54982e-26
485.428	7.77576e-27	6.59592e-27	8.00237e-27	7.85971e-27	1.85349e-26	2.47225e-26
485.508	7.81914e-27	6.55056e-27	7.94356e-27	7.7438e-27	1.85653e-26	2.44749e-26
485.589	7.71018e-27	6.63392e-27	7.78512e-27	7.46459e-27	1.8354e-26	2.41513e-26
485.669	7.75162e-27	6.58964e-27	7.85095e-27	7.40605e-27	1.8383e-26	2.42901e-26
485.749	7.75767e-27	6.57564e-27	7.78434e-27	7.49307e-27	1.84637e-26	2.49422e-26
485.829	7.74256e-27	6.57955e-27	7.86245e-27	7.376e-27	1.83299e-26	2.58345e-26
485.909	7.79992e-27	6.52249e-27	7.95767e-27	7.36519e-27	1.82712e-26	2.73623e-26
485.989	7.69161e-27	6.60518e-27	7.80689e-27	7.25251e-27	1.83974e-26	2.90097e-26
486.07	7.69964e-27	6.58942e-27	7.7218e-27	7.24356e-27	1.83364e-26	3.05531e-26
486.15	7.68096e-27	6.5965e-27	7.80987e-27	7.21348e-27	1.80923e-26	3.084e-26
486.23	7.71343e-27	6.55995e-27	7.81011e-27	7.25813e-27	1.80603e-26	3.024e-26
486.31	7.77006e-27	6.5035e-27	8.00411e-27	7.31579e-27	1.81473e-26	2.93735e-26
486.39	7.70588e-27	6.54869e-27	7.99065e-27	7.23271e-27	1.83943e-26	2.79205e-26
486.47	7.65235e-27	6.58551e-27	7.88824e-27	7.18211e-27	1.85572e-26	2.65558e-26
486.55	7.72289e-27	6.51674e-27	7.84717e-27	7.28105e-27	1.8551e-26	2.57022e-26
486.63	7.68777e-27	6.53762e-27	7.80719e-27	7.39897e-27	1.83113e-26	2.50347e-26
486.711	7.71905e-27	6.50245e-27	7.92106e-27	7.31146e-27	1.8315e-26	2.44111e-26
486.791	7.65856e-27	6.54486e-27	7.80582e-27	7.29643e-27	1.82399e-26	2.36818e-26
486.871	7.59842e-27	6.58767e-27	7.7142e-27	7.17832e-27	1.81604e-26	2.31567e-26
486.951	7.48823e-27	6.67542e-27	7.64885e-27	7.10544e-27	1.78819e-26	2.25214e-26
487.031	7.52519e-27	6.63377e-27	7.59184e-27	7.07435e-27	1.78915e-26	2.22946e-26
487.111	7.63617e-27	6.52879e-27	7.6756e-27	7.09354e-27	1.80565e-26	2.19858e-26
487.191	7.69679e-27	6.46881e-27	7.80668e-27	7.17829e-27	1.86867e-26	2.17801e-26
487.271	7.70128e-27	6.45637e-27	7.77128e-27	7.18352e-27	1.86776e-26	2.14036e-26
487.351	7.67001e-27	6.47393e-27	7.70588e-27	7.1044e-27	1.84577e-26	2.1126e-26
487.431	7.62748e-27	6.5012e-27	7.7579e-27	7.14123e-27	1.84741e-26	2.12786e-26
487.511	7.6538e-27	6.4702e-27	7.70951e-27	7.12442e-27	1.83555e-26	2.12391e-26
487.591	7.59637e-27	6.51026e-27	7.71455e-27	7.18908e-27	1.81185e-26	2.09263e-26
487.671	7.5478e-27	6.54326e-27	7.68641e-27	7.28317e-27	1.83499e-26	2.07899e-26
487.751	7.55921e-27	6.52465e-27	7.69227e-27	7.27117e-27	1.86793e-26	2.09544e-26
487.831	7.66158e-27	6.42907e-27	7.75981e-27	7.3668e-27	1.87261e-26	2.07943e-26
487.911	7.58244e-27	6.48729e-27	7.71319e-27	7.18642e-27	1.86222e-26	2.0552e-26
487.991	7.60846e-27	6.45651e-27	7.53946e-27	7.17448e-27	1.82103e-26	2.04163e-26
488.071	7.56616e-27	6.48382e-27	7.75045e-27	7.17415e-27	1.78899e-26	2.01308e-26
488.151	7.57977e-27	6.46354e-27	7.7955e-27	7.18584e-27	1.82437e-26	2.01215e-26
488.231	7.6284e-27	6.41386e-27	7.78465e-27	7.22782e-27	1.84316e-26	1.99136e-26
488.311	7.59043e-27	6.43723e-27	7.72141e-27	7.22675e-27	1.83576e-26	1.96567e-26
488.391	7.54479e-27	6.46742e-27	7.6999e-27	7.24778e-27	1.82611e-26	1.96362e-26
488.471	7.55508e-27	6.44999e-27	7.6797e-27	7.36162e-27	1.81598e-26	1.96346e-26
488.551	7.60575e-27	6.39857e-27	7.69221e-27	7.53393e-27	1.8365e-26	1.97946e-26
488.63	7.53095e-27	6.45333e-27	7.62832e-27	7.36528e-27	1.8286e-26	1.9338e-26
488.71	7.54548e-27	6.43232e-27	7.61191e-27	7.18997e-27	1.79373e-26	1.8658e-26
488.79	7.4901e-27	6.47111e-27	7.58194e-27	6.92408e-27	1.76738e-26	1.79809e-26
488.87	7.5503e-27	6.41107e-27	7.6589e-27	6.92458e-27	1.82641e-26	1.80592e-26
488.95	7.49054e-27	6.45347e-27	7.56349e-27	6.80607e-27	1.82178e-26	1.77706e-26
489.03	7.44827e-27	6.48134e-27	7.45404e-27	6.79405e-27	1.80414e-26	1.75999e-26
489.11	7.42989e-27	6.48867e-27	7.36894e-27	6.86667e-27	1.79323e-26	1.74946e-26
489.19	7.43393e-27	6.4765e-27	7.33695e-27	6.92638e-27	1.78688e-26	1.74506e-26
489.269	7.54019e-27	6.37693e-27	7.42232e-27	6.93241e-27	1.81889e-26	1.76729e-26
489.349	7.46449e-27	6.43286e-27	7.47867e-27	6.90719e-27	1.75545e-26	1.73171e-26
489.429	7.45208e-27	6.43496e-27	7.55728e-27	6.8545e-27	1.74238e-26	1.70225e-26
489.509	7.44863e-27	6.42934e-27	7.52839e-27	6.85868e-27	1.77918e-26	1.70153e-26
489.589	7.42598e-27	6.44032e-27	7.51265e-27	6.92093e-27	1.85781e-26	1.73071e-26
489.669	7.43806e-27	6.42132e-27	7.59342e-27	6.7613e-27	1.88931e-26	1.73141e-26
489.748	7.47631e-27	6.38004e-27	7.55215e-27	6.9881e-27	1.8975e-26	1.73748e-26
489.828	7.45797e-27	6.38718e-27	7.44231e-27	7.06555e-27	1.87715e-26	1.71572e-26
489.908	7.48869e-27	6.35258e-27	7.49023e-27	7.15325e-27	1.84731e-26	1.71558e-26
489.988	7.42985e-27	6.39424e-27	7.56889e-27	7.00765e-27	1.79476e-26	1.68696e-26
490.068	7.42817e-27	6.38718e-27	7.57259e-27	6.87261e-27	1.7754e-26	1.65186e-26
490.147	7.48072e-27	6.33399e-27	7.53002e-27	6.99933e-27	1.8005e-26	1.66163e-26
490.227	7.4895e-27	6.31818e-27	7.60766e-27	7.08056e-27	1.82921e-26	1.69168e-26
490.307	7.4894e-27	6.30986e-27	7.64575e-27	7.22637e-27	1.85005e-26	1.72001e-26
490.387	7.50235e-27	6.29064e-27	7.57271e-27	7.32607e-27	1.82926e-26	1.7264e-26
490.466	7.47279e-27	6.30706e-27	7.52857e-27	7.27597e-27	1.8178e-26	1.69091e-26
490.546	7.47418e-27	6.29752e-27	7.60189e-27	7.03618e-27	1.82525e-26	1.65629e-26
490.626	7.42833e-27	6.32788e-27	7.42094e-27	7.01393e-27	1.81854e-26	1.64763e-26
490.706	7.36595e-27	6.37287e-27	7.35607e-27	6.98776e-27	1.83874e-26	1.66523e-26
490.785	7.36894e-27	6.36183e-27	7.45651e-27	7.08977e-27	1.88285e-26	1.68964e-26
490.865	7.40839e-27	6.31964e-27	7.43086e-27	7.07058e-27	1.87454e-26	1.68284e-26
490.945	7.45291e-27	6.27366e-27	7.50381e-27	7.26049e-27	1.87224e-26	1.67972e-26
491.024	7.39133e-27	6.3174e-27	7.48903e-27	7.15344e-27	1.84056e-26	1.65405e-26
491.104	7.29362e-27	6.39335e-27	7.30724e-27	6.94594e-27	1.77789e-26	1.60916e-26
491.184	7.34624e-27	6.33924e-27	7.35911e-27	6.8491e-27	1.76476e-26	1.60861e-26
491.263	7.31091e-27	6.36137e-27	7.36218e-27	6.86966e-27	1.78388e-26	1.59878e-26
491.343	7.32674e-27	6.33925e-27	7.41981e-27	6.8955e-27	1.79412e-26	1.61032e-26
491.423	7.40027e-27	6.26811e-27	7.55732e-27	7.09847e-27	1.83083e-26	1.6429e-26
491.502	7.37774e-27	6.27888e-27	7.52054e-27	7.1376e-27	1.82702e-26	1.63997e-26
491.582	7.36048e-27	6.28524e-27	7.43759e-27	6.79103e-27	1.78395e-26	1.58593e-26
491.662	7.36573e-27	6.27246e-27	7.46727e-27	6.67065e-27	1.7858e-26	1.57013e-26
491.741	7.3566e-27	6.27192e-27	7.4431e-27	6.71183e-27	1.82661e-26	1.58068e-26
491.821	7.31403e-27	6.29999e-27	7.36905e-27	6.67103e-27	1.80041e-26	1.55964e-26
491.9	7.29674e-27	6.30653e-27	7.2824e-27	6.65073e-27	1.7588e-26	1.53821e-26
491.98	7.28412e-27	6.30908e-27	7.25131e-27	6.58772e-27	1.73238e-26	1.53759e-26
492.06	7.29773e-27	6.28902e-27	7.30628e-27	6.57389e-27	1.73427e-26	1.53604e-26
492.139	7.29637e-27	6.28188e-27	7.24857e-27	6.59922e-27	1.75032e-26	1.53493e-26
492.219	7.31174e-27	6.26043e-27	7.40641e-27	6.72711e-27	1.79981e-26	1.57007e-26
492.298	7.36741e-27	6.20505e-27	7.44486e-27	6.61176e-27	1.80366e-26	1.56938e-26
492.378	7.28025e-27	6.27085e-27	7.26074e-27	6.67347e-27	1.76394e-26	1.56018e-26
492.457	7.34623e-27	6.20647e-27	7.34352e-27	6.91405e-27	1.80144e-26	1.61516e-26
492.537	7.35054e-27	6.19466e-27	7.41364e-27	7.19984e-27	1.82672e-26	1.65729e-26
492.617	7.36823e-27	6.17168e-27	7.42844e-27	7.20649e-27	1.81175e-26	1.65534e-26
492.696	7.38725e-27	6.14772e-27	7.50552e-27	7.17974e-27	1.84378e-26	1.66185e-26
492.776	7.41454e-27	6.11709e-27	7.49377e-27	7.35793e-27	1.84183e-26	1.69174e-26
492.855	7.4344e-27	6.09276e-27	7.5857e-27	7.31601e-27	1.81037e-26	1.67552e-26
492.935	7.31928e-27	6.18015e-27	7.4903e-27	7.14343e-27	1.76442e-26	1.61204e-26
493.014	7.30755e-27	6.1819e-27	7.40016e-27	7.02246e-27	1.72527e-26	1.57374e-26
493.094	7.22587e-27	6.24336e-27	7.26131e-27	6.83147e-27	1.73963e-26	1.55751e-26
493.173	7.27021e-27	6.19721e-27	7.33161e-27	6.79403e-27	1.77577e-26	1.57471e-26
493.253	7.21565e-27	6.23574e-27	7.24407e-27	6.64492e-27	1.7615e-26	1.55634e-26
493.332	7.20693e-27	6.23505e-27	7.1728e-27	6.51681e-27	1.74857e-26	1.53043e-26
493.412	7.14254e-27	6.28286e-27	7.06303e-27	6.56624e-27	1.72537e-26	1.53555e-26
493.491	7.24576e-27	6.18541e-27	7.20509e-27	6.98754e-27	1.74509e-26	1.6068e-26
493.571	7.23945e-27	6.18264e-27	7.2173e-27	6.93321e-27	1.76726e-26	1.59958e-26
493.65	7.27066e-27	6.14809e-27	7.27066e-27	6.84931e-27	1.77243e-26	1.58215e-26
493.729	7.24031e-27	6.16568e-27	7.31505e-27	6.91328e-27	1.78303e-26	1.60677e-26
493.809	7.21287e-27	6.18094e-27	7.24257e-27	7.09657e-27	1.8263e-26	1.62824e-26
493.888	7.20148e-27	6.18256e-27	7.10538e-27	6.97471e-27	1.8119e-26	1.60391e-26
493.968	7.14814e-27	6.22042e-27	7.07026e-27	6.74933e-27	1.75119e-26	1.56649e-26
494.047	7.18898e-27	6.17703e-27	7.15006e-27	6.8147e-27	1.75888e-26	1.5745e-26
494.127	7.19967e-27	6.15979e-27	7.30239e-27	6.93862e-27	1.7849e-26	1.59896e-26
494.206	7.14919e-27	6.19505e-27	7.33712e-27	6.85216e-27	1.78369e-26	1.58268e-26
494.285	7.21175e-27	6.13337e-27	7.40567e-27	6.91314e-27	1.81391e-26	1.58172e-26
494.365	7.2459e-27	6.09654e-27	7.4222e-27	7.00166e-27	1.79008e-26	1.59702e-26
494.444	7.20879e-27	6.11981e-27	7.38589e-27	6.97335e-27	1.79948e-26	1.588e-26
494.523	7.24468e-27	6.08159e-27	7.38987e-27	6.84709e-27	1.79912e-26	1.5651e-26
494.603	7.19014e-27	6.11957e-27	7.24598e-27	6.83938e-27	1.76098e-26	1.54294e-26
494.682	7.15579e-27	6.14082e-27	7.14484e-27	6.98343e-27	1.716e-26	1.54527e-26
494.761	7.1362e-27	6.14957e-27	7.09411e-27	7.04146e-27	1.74856e-26	1.57197e-26
494.841	7.13009e-27	6.14676e-27	7.18049e-27	6.90356e-27	1.80641e-26	1.58412e-26
494.92	7.15952e-27	6.11355e-27	7.16318e-27	6.83115e-27	1.80614e-26	1.56693e-26
494.999	7.18923e-27	6.08038e-27	7.154e-27	6.98197e-27	1.80209e-26	1.57456e-26
495.079	7.15641e-27	6.1002e-27	7.22168e-27	6.87441e-27	1.80536e-26	1.58455e-26
495.158	7.15867e-27	6.09031e-27	7.23518e-27	6.78529e-27	1.84718e-26	1.58068e-26
495.237	7.13144e-27	6.10551e-27	6.9936e-27	6.69816e-27	1.82808e-26	1.54415e-26
495.317	7.13158e-27	6.0974e-27	6.93018e-27	6.83431e-27	1.78857e-26	1.53411e-26
495.396	7.10474e-27	6.11239e-27	7.07833e-27	6.83348e-27	1.79099e-26	1.54256e-26
495.475	7.13048e-27	6.08242e-27	7.20413e-27	6.69578e-27	1.8096e-26	1.55194e-26
495.555	7.14918e-27	6.05863e-27	7.20292e-27	6.67057e-27	1.76716e-26	1.53476e-26
495.634	7.06552e-27	6.12218e-27	7.15651e-27	6.74438e-27	1.74942e-26	1.53164e-26
495.713	7.04349e-27	6.13326e-27	7.04868e-27	6.76127e-27	1.79229e-26	1.54409e-26
495.792	7.05342e-27	6.11666e-27	7.03613e-27	6.63387e-27	1.78468e-26	1.53485e-26
495.872	7.06046e-27	6.10259e-27	7.01966e-27	6.74415e-27	1.77899e-26	1.55873e-26
495.951	7.01937e-27	6.13023e-27	6.91234e-27	6.64632e-27	1.76439e-26	1.54885e-26
496.03	6.99813e-27	6.14077e-27	6.92909e-27	6.75713e-27	1.77286e-26	1.56192e-26
496.109	7.03539e-27	6.10036e-27	7.02033e-27	6.80973e-27	1.77237e-26	1.56952e-26
496.188	7.07006e-27	6.0626e-27	7.00862e-27	6.73732e-27	1.75955e-26	1.56388e-26
496.268	7.05557e-27	6.0671e-27	6.96276e-27	6.77611e-27	1.75357e-26	1.55881e-26
496.347	7.10935e-27	6.01348e-27	6.99818e-27	6.94053e-27	1.77042e-26	1.5541e-26
496.426	7.08022e-27	6.03029e-27	7.09139e-27	6.89302e-27	1.78907e-26	1.56039e-26
496.505	7.0585e-27	6.04092e-27	7.06593e-27	6.71469e-27	1.76827e-26	1.52775e-26
496.584	6.94985e-27	6.12717e-27	6.93024e-27	6.47849e-27	1.72544e-26	1.49626e-26
496.664	6.96683e-27	6.10431e-27	6.87038e-27	6.46405e-27	1.73701e-26	1.49986e-26
496.743	6.95808e-27	6.10401e-27	6.89714e-27	6.53274e-27	1.75481e-26	1.51463e-26
496.822	6.95344e-27	6.10013e-27	6.88949e-27	6.55219e-27	1.70713e-26	1.5005e-26
496.901	7.00939e-27	6.04367e-27	7.02714e-27	6.70137e-27	1.71192e-26	1.5131e-26
496.98	7.02015e-27	6.02658e-27	7.06661e-27	6.82331e-27	1.7635e-26	1.54768e-26
497.059	7.01291e-27	6.02495e-27	7.01006e-27	6.68115e-27	1.78848e-26	1.55711e-26
497.138	7.02945e-27	6.003e-27	7.01565e-27	6.5618e-27	1.79995e-26	1.54922e-26
497.217	7.01008e-27	6.01172e-27	6.9183e-27	6.65077e-27	1.78029e-26	1.53283e-26
497.297	6.98384e-27	6.02642e-27	6.87201e-27	6.49646e-27	1.69751e-26	1.48582e-26
497.376	6.96912e-27	6.03127e-27	6.93987e-27	6.34527e-27	1.64037e-26	1.45624e-26
497.455	6.99868e-27	5.99806e-27	6.95343e-27	6.36521e-27	1.65443e-26	1.47056e-26
497.534	7.05798e-27	5.94008e-27	7.11663e-27	6.44093e-27	1.72031e-26	1.5025e-26
497.613	7.09971e-27	5.89761e-27	7.18131e-27	6.44794e-27	1.74072e-26	1.49823e-26
497.692	7.03919e-27	5.94045e-27	7.20768e-27	6.61888e-27	1.73218e-26	1.50155e-26
497.771	6.97538e-27	5.98688e-27	7.16023e-27	6.5772e-27	1.74418e-26	1.51418e-26
497.85	7.00152e-27	5.95685e-27	7.20592e-27	6.6322e-27	1.75139e-26	1.54365e-26
497.929	7.00212e-27	5.94862e-27	7.12067e-27	6.67666e-27	1.73219e-26	1.55281e-26
498.008	6.99309e-27	5.94856e-27	6.96875e-27	6.87683e-27	1.75294e-26	1.57636e-26
498.087	6.92136e-27	6.00228e-27	6.98486e-27	7.02145e-27	1.74976e-26	1.59575e-26
498.166	7.00301e-27	5.92479e-27	7.04397e-27	7.10463e-27	1.72349e-26	1.61673e-26
498.245	6.98196e-27	5.93491e-27	6.9436e-27	6.95064e-27	1.71267e-26	1.5936e-26
498.324	6.90427e-27	5.99376e-27	6.81693e-27	6.70823e-27	1.71814e-26	1.55975e-26
498.403	6.91512e-27	5.97663e-27	6.90359e-27	6.52399e-27	1.7541e-26	1.54282e-26
498.482	6.97403e-27	5.9186e-27	7.08836e-27	6.7002e-27	1.77912e-26	1.56391e-26
498.561	6.9396e-27	5.9402e-27	7.13419e-27	6.79921e-27	1.77959e-26	1.57649e-26
498.64	6.89788e-27	5.96831e-27	6.85906e-27	6.69967e-27	1.73482e-26	1.54384e-26
498.719	6.90537e-27	5.95414e-27	6.87722e-27	6.63435e-27	1.72615e-26	1.54456e-26
498.798	6.89333e-27	5.95681e-27	6.90191e-27	6.85361e-27	1.74477e-26	1.57408e-26
498.877	6.90598e-27	5.93824e-27	6.90167e-27	6.86505e-27	1.73596e-26	1.57666e-26
498.956	6.94969e-27	5.89336e-27	6.95463e-27	6.91075e-27	1.75086e-26	1.60201e-26
499.035	7.01457e-27	5.83147e-27	6.98971e-27	6.92466e-27	1.7782e-26	1.62897e-26
499.114	6.96475e-27	5.86547e-27	7.08849e-27	6.77992e-27	1.75558e-26	1.60359e-26
499.193	6.96759e-27	5.85552e-27	7.17056e-27	6.60274e-27	1.72497e-26	1.56093e-26
499.272	6.91273e-27	5.89426e-27	7.11217e-27	6.38353e-27	1.70002e-26	1.50494e-26
499.351	6.86543e-27	5.92711e-27	6.96897e-27	6.22825e-27	1.69531e-26	1.4722e-26
499.43	6.94113e-27	5.85507e-27	6.90509e-27	6.49064e-27	1.73444e-26	1.51094e-26
499.509	6.97641e-27	5.81803e-27	6.95611e-27	6.67872e-27	1.76365e-26	1.55722e-26
499.588	6.9865e-27	5.80216e-27	7.04767e-27	6.59277e-27	1.77794e-26	1.54965e-26
499.666	6.94902e-27	5.82585e-27	6.94175e-27	6.43497e-27	1.75433e-26	1.52089e-26
499.745	6.9207e-27	5.84209e-27	6.88878e-27	6.30113e-27	1.78221e-26	1.51913e-26
499.824	6.89853e-27	5.85327e-27	6.73966e-27	6.15717e-27	1.79198e-26	1.51345e-26
499.903	6.86994e-27	5.87e-27	6.68664e-27	6.10432e-27	1.8037e-26	1.50791e-26
499.982	6.87439e-27	5.85865e-27	6.77048e-27	6.2476e-27	1.77013e-26	1.50067e-26
500.061	6.95882e-27	5.78031e-27	6.87695e-27	6.52796e-27	1.78249e-26	1.54617e-26
500.14	6.92795e-27	5.79853e-27	6.91951e-27	6.69288e-27	1.75192e-26	1.55467e-26
500.218	6.92955e-27	5.78974e-27	6.99774e-27	6.55342e-27	1.72913e-26	1.51863e-26
500.297	6.85313e-27	5.84659e-27	6.94073e-27	6.34187e-27	1.73095e-26	1.48929e-26
500.376	6.88295e-27	5.81385e-27	6.89862e-27	6.28423e-27	1.73386e-26	1.49554e-26
500.455	6.934e-27	5.76374e-27	6.98885e-27	6.49199e-27	1.76279e-26	1.52918e-26
500.534	6.96752e-27	5.72873e-27	7.01194e-27	6.67824e-27	1.80588e-26	1.55873e-26
500.613	6.93941e-27	5.74448e-27	6.96876e-27	6.78234e-27	1.82686e-26	1.59393e-26
500.691	6.86689e-27	5.79751e-27	6.96028e-27	6.61192e-27	1.78271e-26	1.56204e-26
500.77	6.88809e-27	5.7723e-27	6.91057e-27	6.34385e-27	1.72621e-26	1.50891e-26
500.849	6.83818e-27	5.80685e-27	6.89476e-27	6.31851e-27	1.71899e-26	1.51675e-26
500.928	6.81363e-27	5.82024e-27	6.80356e-27	6.43796e-27	1.71089e-26	1.51962e-26
501.006	6.77177e-27	5.84862e-27	6.72288e-27	6.364e-27	1.70638e-26	1.49611e-26
501.085	6.8622e-27	5.76434e-27	6.73528e-27	6.57081e-27	1.73054e-26	1.52291e-26
501.164	6.90418e-27	5.72204e-27	6.81524e-27	6.65306e-27	1.73685e-26	1.5492e-26
501.243	6.78933e-27	5.81111e-27	6.7755e-27	6.4182e-27	1.72504e-26	1.53397e-26
501.321	6.8184e-27	5.77899e-27	6.76395e-27	6.48358e-27	1.71483e-26	1.52929e-26
501.4	6.77516e-27	5.80831e-27	6.78436e-27	6.44981e-27	1.67869e-26	1.51414e-26
501.479	6.84012e-27	5.74593e-27	6.84506e-27	6.57965e-27	1.71708e-26	1.54834e-26
501.558	6.84923e-27	5.73096e-27	6.82336e-27	6.57973e-27	1.7374e-26	1.56057e-26
501.636	6.84496e-27	5.72718e-27	6.76747e-27	6.28649e-27	1.7145e-26	1.50287e-26
501.715	6.82356e-27	5.73774e-27	6.71725e-27	6.14084e-27	1.70103e-26	1.47091e-26
501.794	6.8163e-27	5.73648e-27	6.62886e-27	6.19117e-27	1.72704e-26	1.50354e-26
501.872	6.77931e-27	5.76032e-27	6.54546e-27	6.26924e-27	1.69093e-26	1.50375e-26
501.951	6.77014e-27	5.76072e-27	6.54177e-27	6.31476e-27	1.66036e-26	1.50022e-26
502.03	6.77287e-27	5.75105e-27	6.72493e-27	6.22661e-27	1.6441e-26	1.4889e-26
502.108	6.79126e-27	5.72818e-27	6.84439e-27	6.26163e-27	1.68102e-26	1.51062e-26
502.187	6.75331e-27	5.75292e-27	6.8316e-27	6.30144e-27	1.70656e-26	1.52192e-26
502.266	6.76331e-27	5.7371e-27	6.80844e-27	6.2725e-27	1.74251e-26	1.53808e-26
502.344	6.80911e-27	5.69134e-27	6.87042e-27	6.35531e-27	1.80352e-26	1.56969e-26
502.423	6.79457e-27	5.69619e-27	6.9453e-27	6.19166e-27	1.79726e-26	1.55846e-26
502.502	6.76938e-27	5.71003e-27	6.86061e-27	6.04638e-27	1.7211e-26	1.51747e-26
502.58	6.71398e-27	5.74968e-27	6.73336e-27	6.08451e-27	1.69271e-26	1.50396e-26
502.659	6.73748e-27	5.72236e-27	6.5934e-27	6.09732e-27	1.71711e-26	1.48869e-26
502.737	6.76299e-27	5.69356e-27	6.59666e-27	6.32019e-27	1.73581e-26	1.52881e-26
502.816	6.7731e-27	5.67784e-27	6.60133e-27	6.61748e-27	1.75145e-26	1.57546e-26
502.895	6.7519e-27	5.68835e-27	6.59113e-27	6.63654e-27	1.7212e-26	1.56864e-26
502.973	6.76562e-27	5.66961e-27	6.70453e-27	6.48834e-27	1.74045e-26	1.55077e-26
503.052	6.79979e-27	5.63401e-27	6.83032e-27	6.15398e-27	1.79933e-26	1.5361e-26
503.13	6.77699e-27	5.64572e-27	6.78512e-27	5.95856e-27	1.78265e-26	1.50573e-26
503.209	6.7627e-27	5.6504e-27	6.74313e-27	5.91477e-27	1.74773e-26	1.49746e-26
503.287	6.76155e-27	5.64416e-27	6.73584e-27	5.89201e-27	1.72892e-26	1.49614e-26
503.366	6.73303e-27	5.66079e-27	6.61919e-27	6.03274e-27	1.70153e-26	1.50283e-26
503.444	6.69698e-27	5.68393e-27	6.55233e-27	6.20274e-27	1.68456e-26	1.51548e-26
503.523	6.7e-27	5.67415e-27	6.56286e-27	6.26453e-27	1.72178e-26	1.54863e-26
503.601	6.76851e-27	5.60973e-27	6.73345e-27	6.15112e-27	1.75804e-26	1.55203e-26
503.68	6.66257e-27	5.69144e-27	6.68296e-27	5.94053e-27	1.7271e-26	1.5101e-26
503.758	6.66926e-27	5.67851e-27	6.58505e-27	6.04531e-27	1.7182e-26	1.5382e-26
503.837	6.68017e-27	5.66205e-27	6.55163e-27	6.17055e-27	1.73191e-26	1.55531e-26
503.915	6.66259e-27	5.66974e-27	6.50791e-27	6.33263e-27	1.69628e-26	1.55712e-26
503.994	6.61871e-27	5.69998e-27	6.48257e-27	6.30244e-27	1.6443e-26	1.54754e-26
504.072	6.64614e-27	5.6693e-27	6.46024e-27	6.32542e-27	1.63385e-26	1.53793e-26
504.151	6.61659e-27	5.68733e-27	6.3121e-27	6.24701e-27	1.63805e-26	1.52117e-26
504.229	6.58424e-27	5.70795e-27	6.35159e-27	6.27733e-27	1.65891e-26	1.54737e-26
504.308	6.57327e-27	5.71019e-27	6.39072e-27	6.32096e-27	1.66385e-26	1.54911e-26
504.386	6.56207e-27	5.71266e-27	6.42049e-27	6.27761e-27	1.66634e-26	1.54338e-26
504.465	6.58037e-27	5.68957e-27	6.50184e-27	6.23882e-27	1.68601e-26	1.56084e-26
504.543	6.59552e-27	5.66934e-27	6.48636e-27	6.19836e-27	1.64203e-26	1.54378e-26
504.622	6.54525e-27	5.70554e-27	6.39748e-27	6.19343e-27	1.64526e-26	1.53806e-26
504.7	6.57068e-27	5.6763e-27	6.37668e-27	6.23567e-27	1.69683e-26	1.55707e-26
504.778	6.60645e-27	5.63848e-27	6.39921e-27	6.37495e-27	1.73151e-26	1.58887e-26
504.857	6.59231e-27	5.64338e-27	6.56102e-27	6.30626e-27	1.71492e-26	1.59025e-26
504.935	6.59654e-27	5.63263e-27	6.62522e-27	6.12487e-27	1.68857e-26	1.56553e-26
505.014	6.61304e-27	5.6115e-27	6.60066e-27	6.00693e-27	1.69312e-26	1.57049e-26
505.092	6.56077e-27	5.64893e-27	6.53464e-27	5.86076e-27	1.67705e-26	1.54773e-26
505.17	6.6752e-27	5.54532e-27	6.58863e-27	5.91038e-27	1.69789e-26	1.56331e-26
505.249	6.64588e-27	5.56267e-27	6.59212e-27	5.95119e-27	1.67151e-26	1.57148e-26
505.327	6.61283e-27	5.58332e-27	6.59286e-27	5.96417e-27	1.65809e-26	1.54552e-26
505.405	6.63856e-27	5.55471e-27	6.54748e-27	6.05941e-27	1.68467e-26	1.56017e-26
505.484	6.57387e-27	5.60213e-27	6.41133e-27	6.12491e-27	1.68279e-26	1.57585e-26
505.562	6.53919e-27	5.62465e-27	6.39775e-27	6.24311e-27	1.7202e-26	1.63081e-26
505.64	6.56327e-27	5.59698e-27	6.46034e-27	6.40735e-27	1.71549e-26	1.66312e-26
505.719	6.65869e-27	5.51003e-27	6.63423e-27	6.40737e-27	1.73615e-26	1.68364e-26
505.797	6.64258e-27	5.51637e-27	6.65581e-27	6.07265e-27	1.72809e-26	1.65473e-26
505.875	6.58046e-27	5.56127e-27	6.55005e-27	5.88953e-27	1.72091e-26	1.62101e-26
505.954	6.56442e-27	5.56779e-27	6.52313e-27	5.93119e-27	1.68226e-26	1.60616e-26
506.032	6.54626e-27	5.57614e-27	6.48777e-27	5.94766e-27	1.64834e-26	1.60715e-26
506.11	6.51925e-27	5.59212e-27	6.38924e-27	5.92139e-27	1.62699e-26	1.5986e-26
506.189	6.5132e-27	5.59024e-27	6.37212e-27	6.02703e-27	1.6497e-26	1.61279e-26
506.267	6.52362e-27	5.57429e-27	6.45683e-27	5.93657e-27	1.64774e-26	1.61138e-26
506.345	6.57724e-27	5.52199e-27	6.49569e-27	5.95038e-27	1.67074e-26	1.61813e-26
506.423	6.51691e-27	5.56596e-27	6.46636e-27	5.95956e-27	1.68068e-26	1.61667e-26
506.502	6.53929e-27	5.53997e-27	6.53427e-27	6.033e-27	1.68746e-26	1.62097e-26
506.58	6.55939e-27	5.51608e-27	6.59061e-27	6.05328e-27	1.70848e-26	1.64057e-26
506.658	6.58081e-27	5.49125e-27	6.53031e-27	6.04858e-27	1.71755e-26	1.66737e-26
506.736	6.53677e-27	5.52118e-27	6.49482e-27	6.01982e-27	1.68086e-26	1.66643e-26
506.814	6.46465e-27	5.57559e-27	6.32634e-27	5.90149e-27	1.66057e-26	1.66187e-26
506.893	6.56406e-27	5.48445e-27	6.3388e-27	5.99307e-27	1.68228e-26	1.68257e-26
506.971	6.59917e-27	5.4485e-27	6.40779e-27	5.99824e-27	1.68198e-26	1.68381e-26
507.049	6.55933e-27	5.4746e-27	6.44596e-27	5.96482e-27	1.69701e-26	1.68841e-26
507.127	6.50511e-27	5.51317e-27	6.44676e-27	5.79856e-27	1.66911e-26	1.64118e-26
507.205	6.51021e-27	5.50193e-27	6.44691e-27	5.9033e-27	1.68077e-26	1.65998e-26
507.284	6.54395e-27	5.46676e-27	6.51202e-27	5.96578e-27	1.73765e-26	1.72533e-26
507.362	6.58879e-27	5.42285e-27	6.5195e-27	6.00675e-27	1.7297e-26	1.7345e-26
507.44	6.55961e-27	5.44005e-27	6.44787e-27	5.85069e-27	1.71454e-26	1.70784e-26
507.518	6.57071e-27	5.42407e-27	6.4144e-27	5.81063e-27	1.70564e-26	1.69537e-26
507.596	6.46608e-27	5.50467e-27	6.34099e-27	5.85603e-27	1.65473e-26	1.68127e-26
507.674	6.49279e-27	5.4752e-27	6.35013e-27	5.98351e-27	1.62743e-26	1.68413e-26
507.753	6.49152e-27	5.46939e-27	6.43507e-27	5.93887e-27	1.64279e-26	1.70874e-26
507.831	6.47228e-27	5.47873e-27	6.39948e-27	5.77267e-27	1.63525e-26	1.68065e-26
507.909	6.48931e-27	5.45753e-27	6.36197e-27	5.74985e-27	1.66054e-26	1.69826e-26
507.987	6.51464e-27	5.42956e-27	6.41561e-27	5.71995e-27	1.68283e-26	1.71366e-26
508.065	6.4618e-27	5.46697e-27	6.44037e-27	5.87294e-27	1.68154e-26	1.7317e-26
508.143	6.51543e-27	5.4153e-27	6.46173e-27	6.10951e-27	1.66943e-26	1.76468e-26
508.221	6.44827e-27	5.46468e-27	6.32959e-27	5.92201e-27	1.64452e-26	1.73645e-26
508.299	6.42728e-27	5.47562e-27	6.27239e-27	5.74882e-27	1.62159e-26	1.69466e-26
508.377	6.36089e-27	5.52569e-27	6.123e-27	5.83524e-27	1.62455e-26	1.70575e-26
508.455	6.39571e-27	5.4888e-27	6.23603e-27	6.05674e-27	1.67811e-26	1.76592e-26
508.533	6.4178e-27	5.46311e-27	6.2555e-27	5.95485e-27	1.66098e-26	1.7617e-26
508.611	6.40756e-27	5.46496e-27	6.2715e-27	5.86218e-27	1.62613e-26	1.7392e-26
508.69	6.39825e-27	5.46605e-27	6.34466e-27	5.97586e-27	1.64154e-26	1.74939e-26
508.768	6.44677e-27	5.41823e-27	6.39427e-27	6.07183e-27	1.66709e-26	1.78151e-26
508.846	6.38786e-27	5.46123e-27	6.38487e-27	5.99817e-27	1.65566e-26	1.78064e-26
508.924	6.39062e-27	5.45205e-27	6.31564e-27	5.89734e-27	1.61577e-26	1.74524e-26
509.002	6.38994e-27	5.44581e-27	6.30663e-27	5.93616e-27	1.59202e-26	1.76506e-26
509.08	6.47624e-27	5.36673e-27	6.31785e-27	6.09935e-27	1.62953e-26	1.79747e-26
509.158	6.38977e-27	5.43236e-27	6.29655e-27	6.14916e-27	1.62694e-26	1.80204e-26
509.236	6.4177e-27	5.40202e-27	6.32125e-27	6.26234e-27	1.62946e-26	1.81661e-26
509.314	6.43113e-27	5.38404e-27	6.35851e-27	6.31624e-27	1.64564e-26	1.83471e-26
509.392	6.43312e-27	5.37566e-27	6.34304e-27	6.22291e-27	1.64676e-26	1.82935e-26
509.47	6.37609e-27	5.41684e-27	6.33308e-27	6.09638e-27	1.65783e-26	1.83069e-26
509.547	6.37583e-27	5.41031e-27	6.39539e-27	5.98172e-27	1.65614e-26	1.81142e-26
509.625	6.32012e-27	5.45107e-27	6.25785e-27	5.87618e-27	1.62917e-26	1.77123e-26
509.703	6.40592e-27	5.37153e-27	6.26368e-27	5.91417e-27	1.63684e-26	1.78037e-26
509.781	6.40114e-27	5.36883e-27	6.21453e-27	5.96456e-27	1.61571e-26	1.77726e-26
509.859	6.36339e-27	5.39386e-27	6.25655e-27	5.88213e-27	1.61154e-26	1.76853e-26
509.937	6.40632e-27	5.35114e-27	6.3277e-27	5.92328e-27	1.62183e-26	1.78889e-26
510.015	6.3959e-27	5.35316e-27	6.3108e-27	5.98176e-27	1.60471e-26	1.80003e-26
510.093	6.35062e-27	5.38451e-27	6.24962e-27	5.8863e-27	1.60908e-26	1.81404e-26
510.171	6.40178e-27	5.33494e-27	6.33307e-27	5.87824e-27	1.678e-26	1.8451e-26
510.249	6.40162e-27	5.32843e-27	6.32268e-27	5.92759e-27	1.66478e-26	1.82931e-26
510.327	6.33147e-27	5.3806e-27	6.24238e-27	5.8816e-27	1.62988e-26	1.78747e-26
510.405	6.3523e-27	5.35633e-27	6.33271e-27	5.89513e-27	1.62446e-26	1.78762e-26
510.482	6.30355e-27	5.39093e-27	6.30229e-27	5.86925e-27	1.58173e-26	1.75764e-26
510.56	6.27072e-27	5.41235e-27	6.25267e-27	5.93218e-27	1.57684e-26	1.76322e-26
510.638	6.31008e-27	5.37198e-27	6.27763e-27	5.95291e-27	1.59946e-26	1.7724e-26
510.716	6.30393e-27	5.37053e-27	6.22009e-27	5.76211e-27	1.58947e-26	1.72796e-26
510.794	6.25346e-27	5.40703e-27	6.15495e-27	5.52862e-27	1.59072e-26	1.68524e-26
510.872	6.3042e-27	5.35695e-27	6.25933e-27	5.5699e-27	1.60991e-26	1.69219e-26
510.95	6.31666e-27	5.33978e-27	6.28282e-27	5.74411e-27	1.60739e-26	1.69596e-26
511.027	6.30487e-27	5.34309e-27	6.2444e-27	5.78532e-27	1.61741e-26	1.69332e-26
511.105	6.34844e-27	5.29994e-27	6.34276e-27	5.88763e-27	1.66104e-26	1.71923e-26
511.183	6.32325e-27	5.31439e-27	6.28536e-27	5.85464e-27	1.64535e-26	1.70461e-26
511.261	6.28513e-27	5.3399e-27	6.22764e-27	5.8151e-27	1.6168e-26	1.68416e-26
511.339	6.24751e-27	5.36531e-27	6.22291e-27	5.84759e-27	1.58231e-26	1.64107e-26
511.416	6.25683e-27	5.35069e-27	6.29257e-27	5.85023e-27	1.57379e-26	1.62255e-26
511.494	6.30653e-27	5.30205e-27	6.28208e-27	5.7864e-27	1.5725e-26	1.61308e-26
511.572	6.25245e-27	5.34116e-27	6.16256e-27	5.80232e-27	1.56158e-26	1.61953e-26
511.65	6.22126e-27	5.36122e-27	6.21104e-27	5.95977e-27	1.5779e-26	1.62572e-26
511.727	6.27234e-27	5.31108e-27	6.26087e-27	6.02121e-27	1.59628e-26	1.64894e-26
511.805	6.22944e-27	5.34094e-27	6.17369e-27	5.9949e-27	1.59568e-26	1.62104e-26
511.883	6.24741e-27	5.31901e-27	6.19066e-27	5.9712e-27	1.59293e-26	1.59808e-26
511.961	6.26914e-27	5.29407e-27	6.27403e-27	6.0285e-27	1.59744e-26	1.6066e-26
512.038	6.23389e-27	5.31734e-27	6.29437e-27	5.82153e-27	1.57328e-26	1.55699e-26
512.116	6.19999e-27	5.33972e-27	6.16162e-27	5.60514e-27	1.53165e-26	1.50038e-26
512.194	6.24899e-27	5.2914e-27	6.14433e-27	5.70716e-27	1.53511e-26	1.518e-26
512.271	6.26704e-27	5.26968e-27	6.15167e-27	5.7949e-27	1.51619e-26	1.50155e-26
512.349	6.16287e-27	5.35189e-27	6.0495e-27	5.81951e-27	1.50715e-26	1.48499e-26
512.427	6.27162e-27	5.25282e-27	6.17605e-27	5.93258e-27	1.53763e-26	1.51193e-26
512.505	6.19952e-27	5.30719e-27	6.19904e-27	5.88664e-27	1.52969e-26	1.49284e-26
512.582	6.28247e-27	5.23083e-27	6.27887e-27	5.91462e-27	1.54392e-26	1.49275e-26
512.66	6.2257e-27	5.27187e-27	6.23631e-27	5.88339e-27	1.55029e-26	1.48935e-26
512.738	6.25899e-27	5.23744e-27	6.1951e-27	5.93836e-27	1.58579e-26	1.51671e-26
512.815	6.17955e-27	5.29804e-27	6.04975e-27	5.82345e-27	1.56234e-26	1.48304e-26
512.893	6.20796e-27	5.26734e-27	6.07293e-27	5.76627e-27	1.54472e-26	1.46533e-26
512.97	6.20748e-27	5.26125e-27	6.02013e-27	5.91301e-27	1.54794e-26	1.47776e-26
513.048	6.26185e-27	5.20926e-27	6.14196e-27	6.19001e-27	1.62066e-26	1.52844e-26
513.126	6.23788e-27	5.22277e-27	6.15998e-27	6.22045e-27	1.64554e-26	1.53779e-26
513.203	6.19458e-27	5.25269e-27	6.17542e-27	6.0358e-27	1.57923e-26	1.49589e-26
513.281	6.1637e-27	5.27243e-27	6.27168e-27	5.83827e-27	1.56806e-26	1.46516e-26
513.359	6.17353e-27	5.25758e-27	6.21646e-27	5.75408e-27	1.53315e-26	1.42628e-26
513.436	6.19841e-27	5.23008e-27	6.22344e-27	5.70483e-27	1.52398e-26	1.42481e-26
513.514	6.1815e-27	5.23788e-27	6.29853e-27	5.69521e-27	1.53586e-26	1.42049e-26
513.591	6.1646e-27	5.24573e-27	6.31921e-27	5.71345e-27	1.54972e-26	1.41476e-26
513.669	6.19401e-27	5.21446e-27	6.24825e-27	5.5893e-27	1.5329e-26	1.39273e-26
513.746	6.16168e-27	5.2353e-27	6.22226e-27	5.56935e-27	1.5286e-26	1.37987e-26
513.824	6.1801e-27	5.21332e-27	6.15969e-27	5.59031e-27	1.51265e-26	1.37467e-26
513.902	6.16107e-27	5.22295e-27	6.18293e-27	5.66327e-27	1.5427e-26	1.37919e-26
513.979	6.19502e-27	5.18801e-27	6.13776e-27	5.73659e-27	1.55946e-26	1.38959e-26
514.057	6.14357e-27	5.2249e-27	6.02905e-27	5.6849e-27	1.51145e-26	1.37125e-26
514.134	6.18361e-27	5.18478e-27	6.08279e-27	5.72084e-27	1.51076e-26	1.37874e-26
514.212	6.14181e-27	5.21356e-27	6.14732e-27	5.61914e-27	1.51995e-26	1.36223e-26
514.289	6.16794e-27	5.18515e-27	6.16404e-27	5.52186e-27	1.5364e-26	1.36168e-26
514.367	6.18864e-27	5.16151e-27	6.15314e-27	5.6236e-27	1.53132e-26	1.37672e-26
514.444	6.22222e-27	5.12744e-27	6.24349e-27	5.75569e-27	1.51982e-26	1.38767e-26
514.522	6.1488e-27	5.18211e-27	6.24437e-27	5.81744e-27	1.5367e-26	1.39957e-26
514.599	6.18554e-27	5.1451e-27	6.24819e-27	5.93658e-27	1.52192e-26	1.39089e-26
514.677	6.15672e-27	5.16277e-27	6.23883e-27	5.89325e-27	1.53455e-26	1.39262e-26
514.754	6.15961e-27	5.15402e-27	6.24846e-27	5.76654e-27	1.56367e-26	1.36721e-26
514.832	6.12419e-27	5.17739e-27	6.16487e-27	5.60465e-27	1.55985e-26	1.3385e-26
514.909	6.07435e-27	5.21336e-27	6.05614e-27	5.6478e-27	1.52523e-26	1.32372e-26
514.986	6.05939e-27	5.21979e-27	6.05782e-27	5.72772e-27	1.48815e-26	1.32688e-26
515.064	6.09195e-27	5.1856e-27	6.04066e-27	5.75e-27	1.47416e-26	1.32514e-26
515.141	6.08193e-27	5.18776e-27	6.03484e-27	5.8027e-27	1.49767e-26	1.32851e-26
515.219	6.08558e-27	5.17831e-27	6.07524e-27	5.75237e-27	1.52231e-26	1.32706e-26
515.296	6.14913e-27	5.11866e-27	6.05219e-27	5.80781e-27	1.53953e-26	1.34752e-26
515.374	6.0704e-27	5.17851e-27	5.97075e-27	5.7963e-27	1.52261e-26	1.34843e-26
515.451	6.05955e-27	5.18141e-27	6.01385e-27	5.681e-27	1.49706e-26	1.33065e-26
515.528	6.06899e-27	5.16704e-27	6.07279e-27	5.67176e-27	1.53981e-26	1.33992e-26
515.606	6.06925e-27	5.16049e-27	6.1391e-27	5.8098e-27	1.56081e-26	1.35905e-26
515.683	6.11034e-27	5.11962e-27	6.27535e-27	5.92296e-27	1.54914e-26	1.37656e-26
515.761	6.10684e-27	5.11628e-27	6.33558e-27	5.97911e-27	1.54176e-26	1.37832e-26
515.838	6.06565e-27	5.14463e-27	6.27145e-27	5.95966e-27	1.54102e-26	1.3743e-26
515.915	6.11869e-27	5.09393e-27	6.29407e-27	5.97861e-27	1.56787e-26	1.40258e-26
515.993	6.11971e-27	5.08685e-27	6.2635e-27	5.87223e-27	1.5573e-26	1.36739e-26
516.07	6.09178e-27	5.10387e-27	6.21472e-27	5.79261e-27	1.55316e-26	1.36034e-26
516.147	6.05961e-27	5.12462e-27	6.14575e-27	5.81837e-27	1.52756e-26	1.34995e-26
516.225	6.09985e-27	5.08469e-27	6.12256e-27	5.83343e-27	1.55599e-26	1.37371e-26
516.302	6.11574e-27	5.06534e-27	6.16637e-27	5.90031e-27	1.59571e-26	1.38432e-26
516.379	6.05067e-27	5.11341e-27	6.17868e-27	5.75368e-27	1.59108e-26	1.37491e-26
516.457	6.01813e-27	5.13471e-27	6.12434e-27	5.69873e-27	1.56326e-26	1.34974e-26
516.534	6.04868e-27	5.10261e-27	6.1651e-27	5.758e-27	1.5486e-26	1.33488e-26
516.611	6.10321e-27	5.05098e-27	6.22843e-27	5.80803e-27	1.52883e-26	1.34414e-26
516.688	6.12243e-27	5.02904e-27	6.35182e-27	5.89588e-27	1.54419e-26	1.35797e-26
516.766	6.10902e-27	5.03391e-27	6.29343e-27	5.76461e-27	1.54015e-26	1.33296e-26
516.843	6.11316e-27	5.02438e-27	6.20354e-27	5.67623e-27	1.51104e-26	1.31603e-26
516.92	5.99797e-27	5.11435e-27	6.09868e-27	5.65199e-27	1.44984e-26	1.28824e-26
516.997	5.98172e-27	5.12197e-27	6.0791e-27	5.61041e-27	1.46628e-26	1.30392e-26
517.075	5.97288e-27	5.12329e-27	6.08764e-27	5.68663e-27	1.50469e-26	1.31938e-26
517.152	6.00174e-27	5.0925e-27	6.16784e-27	5.87624e-27	1.5609e-26	1.35654e-26
517.229	5.99283e-27	5.09384e-27	6.16414e-27	5.81422e-27	1.55606e-26	1.33138e-26
517.306	5.99474e-27	5.08603e-27	6.03754e-27	5.78692e-27	1.53439e-26	1.31448e-26
517.384	5.94183e-27	5.12497e-27	6.06275e-27	5.7927e-27	1.52152e-26	1.32097e-26
517.461	5.99008e-27	5.0776e-27	6.09045e-27	5.77691e-27	1.51977e-26	1.33066e-26
517.538	6.00543e-27	5.0585e-27	6.07879e-27	5.61927e-27	1.48963e-26	1.31008e-26
517.615	5.97411e-27	5.07877e-27	6.04122e-27	5.58817e-27	1.47179e-26	1.2933e-26
517.692	5.95747e-27	5.08673e-27	6.11179e-27	5.48781e-27	1.48728e-26	1.28991e-26
517.77	5.9661e-27	5.07322e-27	6.16246e-27	5.43724e-27	1.4819e-26	1.28923e-26
517.847	5.91013e-27	5.11493e-27	6.06048e-27	5.56299e-27	1.45035e-26	1.28888e-26
517.924	5.92704e-27	5.09418e-27	5.96382e-27	5.6682e-27	1.46177e-26	1.3086e-26
518.001	5.96988e-27	5.05157e-27	5.97712e-27	5.6243e-27	1.46299e-26	1.31083e-26
518.078	5.93502e-27	5.075e-27	6.05101e-27	5.68672e-27	1.48216e-26	1.31623e-26
518.155	5.97662e-27	5.03365e-27	6.11106e-27	5.63125e-27	1.47536e-26	1.315e-26
518.233	5.93415e-27	5.06343e-27	5.98886e-27	5.51054e-27	1.45483e-26	1.30311e-26
518.31	5.85102e-27	5.12898e-27	5.99975e-27	5.55517e-27	1.45024e-26	1.29822e-26
518.387	5.93619e-27	5.04943e-27	5.98109e-27	5.60344e-27	1.5006e-26	1.32304e-26
518.464	5.95275e-27	5.02931e-27	6.06676e-27	5.67492e-27	1.52544e-26	1.33033e-26
518.541	5.89999e-27	5.06803e-27	6.00453e-27	5.62459e-27	1.49399e-26	1.29882e-26
518.618	5.90529e-27	5.05735e-27	5.94949e-27	5.73153e-27	1.49067e-26	1.30918e-26
518.695	5.93811e-27	5.02338e-27	5.99103e-27	5.96179e-27	1.48065e-26	1.34364e-26
518.772	5.95746e-27	5.00105e-27	6.11781e-27	5.97875e-27	1.49004e-26	1.35673e-26
518.849	5.97645e-27	4.97916e-27	6.11065e-27	5.80547e-27	1.48575e-26	1.33764e-26
518.926	5.85088e-27	5.07959e-27	5.98051e-27	5.76403e-27	1.44612e-26	1.30766e-26
519.004	5.95855e-27	4.982e-27	6.02868e-27	5.85531e-27	1.43674e-26	1.31898e-26
519.081	5.88007e-27	5.04221e-27	6.01166e-27	5.70795e-27	1.43569e-26	1.31295e-26
519.158	5.90615e-27	5.01393e-27	5.95387e-27	5.75386e-27	1.4398e-26	1.3126e-26
519.235	5.86698e-27	5.04121e-27	5.89746e-27	5.65035e-27	1.42694e-26	1.31805e-26
519.312	5.88444e-27	5.02021e-27	5.99528e-27	5.63002e-27	1.43548e-26	1.33699e-26
519.389	5.87932e-27	5.0185e-27	6.10089e-27	5.74506e-27	1.46994e-26	1.34954e-26
519.466	5.89644e-27	4.99792e-27	6.13279e-27	5.68029e-27	1.48472e-26	1.34295e-26
519.543	5.91421e-27	4.97693e-27	6.147e-27	5.80007e-27	1.51673e-26	1.36072e-26
519.62	5.90551e-27	4.97823e-27	6.08107e-27	5.75942e-27	1.49056e-26	1.3499e-26
519.697	5.87712e-27	4.99617e-27	6.08598e-27	5.86293e-27	1.47068e-26	1.33819e-26
519.774	5.84447e-27	5.01794e-27	6.06444e-27	5.81576e-27	1.45261e-26	1.32329e-26
519.851	5.85739e-27	5.00086e-27	6.01895e-27	5.67072e-27	1.45601e-26	1.31048e-26
519.928	5.86595e-27	4.98756e-27	5.99947e-27	5.53721e-27	1.44948e-26	1.30921e-26
520.005	5.84767e-27	4.99707e-27	5.96874e-27	5.58212e-27	1.43175e-26	1.32528e-26
520.082	5.78697e-27	5.04327e-27	5.94289e-27	5.67075e-27	1.43671e-26	1.34119e-26
520.159	5.83402e-27	4.99666e-27	5.9677e-27	5.69542e-27	1.45619e-26	1.35539e-26
520.236	5.88603e-27	4.94666e-27	5.99804e-27	5.68922e-27	1.48733e-26	1.35725e-26
520.312	5.86471e-27	4.95861e-27	6.01174e-27	5.70519e-27	1.51629e-26	1.36118e-26
520.389	5.79709e-27	5.01026e-27	5.92163e-27	5.65126e-27	1.47648e-26	1.34312e-26
520.466	5.81312e-27	4.99046e-27	5.94512e-27	5.69823e-27	1.45569e-26	1.34421e-26
520.543	5.80912e-27	4.98788e-27	5.98307e-27	5.78515e-27	1.45415e-26	1.3616e-26
520.62	5.92407e-27	4.88547e-27	6.07728e-27	5.80544e-27	1.48479e-26	1.3688e-26
520.697	5.90466e-27	4.89558e-27	6.06007e-27	5.86676e-27	1.5001e-26	1.36873e-26
520.774	5.80915e-27	4.96986e-27	5.95034e-27	5.77816e-27	1.48569e-26	1.35389e-26
520.851	5.77385e-27	4.99416e-27	5.89897e-27	5.9189e-27	1.4604e-26	1.35479e-26
520.928	5.86527e-27	4.91061e-27	5.97388e-27	5.91774e-27	1.45669e-26	1.37111e-26
521.005	5.74779e-27	5.00469e-27	5.94762e-27	5.72376e-27	1.44236e-26	1.34773e-26
521.081	5.76547e-27	4.98338e-27	5.84803e-27	5.66851e-27	1.45106e-26	1.33689e-26
521.158	5.70773e-27	5.02764e-27	5.8201e-27	5.63131e-27	1.4484e-26	1.32735e-26
521.235	5.75983e-27	4.97627e-27	5.92995e-27	5.6993e-27	1.45695e-26	1.34855e-26
521.312	5.77759e-27	4.95505e-27	5.97018e-27	5.75907e-27	1.45042e-26	1.34985e-26
521.389	5.76466e-27	4.96017e-27	5.89386e-27	5.72309e-27	1.42798e-26	1.33496e-26
521.466	5.77304e-27	4.94704e-27	5.9632e-27	5.8246e-27	1.44512e-26	1.36527e-26
521.542	5.85993e-27	4.86804e-27	6.07195e-27	6.02981e-27	1.47018e-26	1.41307e-26
521.619	5.79034e-27	4.92048e-27	6.07653e-27	6.08234e-27	1.46275e-26	1.41937e-26
521.696	5.81186e-27	4.89642e-27	5.9873e-27	5.88884e-27	1.43469e-26	1.37848e-26
521.773	5.78934e-27	4.90952e-27	6.03197e-27	5.72586e-27	1.42132e-26	1.35373e-26
521.85	5.76152e-27	4.92725e-27	6.00004e-27	5.69526e-27	1.4069e-26	1.33873e-26
521.926	5.82664e-27	4.86649e-27	6.047e-27	5.88269e-27	1.4634e-26	1.39107e-26
522.003	5.83555e-27	4.85326e-27	6.10165e-27	6.00994e-27	1.49387e-26	1.40889e-26
522.08	5.91786e-27	4.78024e-27	6.14044e-27	6.00477e-27	1.48448e-26	1.40928e-26
522.157	5.85755e-27	4.82351e-27	6.11525e-27	5.98723e-27	1.45553e-26	1.39905e-26
522.234	5.77708e-27	4.88465e-27	6.03136e-27	6.00008e-27	1.44918e-26	1.40022e-26
522.31	5.76872e-27	4.88585e-27	6.03105e-27	5.90384e-27	1.4608e-26	1.39943e-26
522.387	5.88322e-27	4.78531e-27	6.08176e-27	6.06722e-27	1.48472e-26	1.42477e-26
522.464	5.81112e-27	4.8387e-27	6.09802e-27	5.97348e-27	1.47677e-26	1.39035e-26
522.54	5.73826e-27	4.89411e-27	6.01393e-27	5.87861e-27	1.46127e-26	1.3623e-26
522.617	5.86062e-27	4.78649e-27	6.06994e-27	6.03886e-27	1.46678e-26	1.3924e-26
522.694	5.7785e-27	4.84851e-27	6.08187e-27	6.07817e-27	1.43645e-26	1.38036e-26
522.771	5.73527e-27	4.87911e-27	5.95445e-27	5.87452e-27	1.40011e-26	1.33179e-26
522.847	5.78454e-27	4.83188e-27	5.96646e-27	5.84425e-27	1.41198e-26	1.33097e-26
522.924	5.74669e-27	4.85781e-27	5.86733e-27	5.8935e-27	1.39647e-26	1.3168e-26
523.001	5.81774e-27	4.79293e-27	5.93033e-27	5.8805e-27	1.41475e-26	1.32927e-26
523.077	5.76207e-27	4.83332e-27	5.89874e-27	5.87921e-27	1.41931e-26	1.32742e-26
523.154	5.7175e-27	4.86507e-27	5.89882e-27	6.01651e-27	1.4227e-26	1.33596e-26
523.231	5.70139e-27	4.87296e-27	5.94053e-27	6.13378e-27	1.43974e-26	1.35308e-26
523.307	5.72185e-27	4.84979e-27	5.97052e-27	6.13806e-27	1.41113e-26	1.34439e-26
523.384	5.70521e-27	4.85809e-27	5.95558e-27	6.06778e-27	1.37082e-26	1.32941e-26
523.461	5.69214e-27	4.86341e-27	5.9205e-27	6.04691e-27	1.39685e-26	1.32844e-26
523.537	5.67097e-27	4.87571e-27	5.9633e-27	6.11896e-27	1.44506e-26	1.35289e-26
523.614	5.71638e-27	4.83131e-27	6.01159e-27	6.02848e-27	1.44781e-26	1.34537e-26
523.69	5.70452e-27	4.83555e-27	6.02812e-27	5.89974e-27	1.44592e-26	1.31462e-26
523.767	5.7267e-27	4.81113e-27	6.09576e-27	5.91989e-27	1.43852e-26	1.30586e-26
523.844	5.70066e-27	4.8273e-27	5.99815e-27	5.90423e-27	1.4069e-26	1.28159e-26
523.92	5.6624e-27	4.85404e-27	5.8732e-27	5.77391e-27	1.36452e-26	1.25077e-26
523.997	5.77413e-27	4.75471e-27	5.94131e-27	5.97577e-27	1.38181e-26	1.28851e-26
524.073	5.68161e-27	4.82616e-27	5.90753e-27	5.74114e-27	1.36861e-26	1.2648e-26
524.15	5.67068e-27	4.82968e-27	5.9508e-27	5.7922e-27	1.37251e-26	1.25153e-26
524.227	5.69529e-27	4.80315e-27	5.91454e-27	5.88464e-27	1.38591e-26	1.27701e-26
524.303	5.64273e-27	4.84201e-27	5.85769e-27	6.03002e-27	1.39563e-26	1.29915e-26
524.38	5.70109e-27	4.78687e-27	5.93978e-27	6.11989e-27	1.39922e-26	1.2965e-26
524.456	5.61039e-27	4.85827e-27	5.87836e-27	6.0178e-27	1.37813e-26	1.26928e-26
524.533	5.67562e-27	4.79687e-27	6.03488e-27	6.03239e-27	1.39996e-26	1.27382e-26
524.609	5.65815e-27	4.80592e-27	5.96576e-27	6.10328e-27	1.42948e-26	1.2975e-26
524.686	5.67604e-27	4.78512e-27	5.9691e-27	6.11043e-27	1.40792e-26	1.28129e-26
524.762	5.64677e-27	4.80415e-27	5.90196e-27	6.09375e-27	1.37126e-26	1.25657e-26
524.839	5.61439e-27	4.82605e-27	5.82587e-27	6.01508e-27	1.35631e-26	1.25006e-26
524.915	5.60451e-27	4.82879e-27	5.84141e-27	5.9746e-27	1.34239e-26	1.234e-26
524.992	5.67686e-27	4.76176e-27	5.86992e-27	6.07051e-27	1.3329e-26	1.23439e-26
525.068	5.61182e-27	4.81109e-27	5.85155e-27	6.09174e-27	1.36768e-26	1.25293e-26
525.145	5.6678e-27	4.75804e-27	5.96701e-27	6.14201e-27	1.40462e-26	1.26724e-26
525.221	5.57906e-27	4.82779e-27	5.92919e-27	6.03908e-27	1.39272e-26	1.25526e-26
525.298	5.57396e-27	4.82647e-27	5.95208e-27	6.03749e-27	1.38981e-26	1.23602e-26
525.374	5.60779e-27	4.79174e-27	5.97789e-27	6.16521e-27	1.38731e-26	1.23925e-26
525.451	5.62218e-27	4.77384e-27	5.97264e-27	6.17672e-27	1.37886e-26	1.23097e-26
525.527	5.67487e-27	4.72403e-27	6.06097e-27	6.3163e-27	1.3843e-26	1.25124e-26
525.603	5.66962e-27	4.72279e-27	6.0593e-27	6.38712e-27	1.41044e-26	1.27486e-26
525.68	5.70177e-27	4.69068e-27	5.97412e-27	6.25861e-27	1.40065e-26	1.26435e-26
525.756	5.68995e-27	4.69484e-27	5.9569e-27	6.2844e-27	1.41106e-26	1.24545e-26
525.833	5.64579e-27	4.72585e-27	6.01025e-27	6.24369e-27	1.3988e-26	1.24215e-26
525.909	5.66441e-27	4.70479e-27	5.98188e-27	6.43046e-27	1.38368e-26	1.2729e-26
525.985	5.57408e-27	4.77517e-27	5.92018e-27	6.4515e-27	1.34331e-26	1.25826e-26
526.062	5.60857e-27	4.74026e-27	6.06434e-27	6.45439e-27	1.3479e-26	1.248e-26
526.138	5.60734e-27	4.7357e-27	6.1079e-27	6.32074e-27	1.37232e-26	1.24829e-26
526.215	5.61569e-27	4.72309e-27	6.00736e-27	6.44122e-27	1.42063e-26	1.25879e-26
526.291	5.60168e-27	4.72927e-27	5.98556e-27	6.47466e-27	1.43326e-26	1.26753e-26
526.367	5.62678e-27	4.70267e-27	6.02409e-27	6.47813e-27	1.41564e-26	1.25781e-26
526.444	5.59143e-27	4.72673e-27	5.84058e-27	6.26846e-27	1.38788e-26	1.2157e-26
526.52	5.59469e-27	4.7184e-27	5.88453e-27	6.39665e-27	1.38399e-26	1.23143e-26
526.596	5.54496e-27	4.75498e-27	5.87678e-27	6.47646e-27	1.39147e-26	1.23008e-26
526.673	5.62705e-27	4.68027e-27	5.8701e-27	6.60013e-27	1.42898e-26	1.25529e-26
526.749	5.6355e-27	4.66777e-27	5.96569e-27	6.66668e-27	1.45575e-26	1.27159e-26
526.825	5.61571e-27	4.67864e-27	5.98249e-27	6.56258e-27	1.45929e-26	1.25935e-26
526.902	5.60377e-27	4.68305e-27	5.94383e-27	6.44505e-27	1.39543e-26	1.22996e-26
526.978	5.62789e-27	4.65754e-27	6.00399e-27	6.45254e-27	1.35938e-26	1.20874e-26
527.054	5.62331e-27	4.65583e-27	6.0402e-27	6.2811e-27	1.34579e-26	1.19117e-26
527.13	5.58823e-27	4.67945e-27	5.96943e-27	6.16476e-27	1.33475e-26	1.16513e-26
527.207	5.56707e-27	4.69165e-27	5.81015e-27	6.31889e-27	1.31278e-26	1.15527e-26
527.283	5.50564e-27	4.73828e-27	5.73839e-27	6.31249e-27	1.30544e-26	1.16563e-26
527.359	5.55614e-27	4.68979e-27	5.80461e-27	6.36208e-27	1.3034e-26	1.17058e-26
527.436	5.51718e-27	4.71725e-27	5.80128e-27	6.28718e-27	1.30182e-26	1.15078e-26
527.512	5.50568e-27	4.72152e-27	5.74435e-27	6.35057e-27	1.31066e-26	1.16376e-26
527.588	5.48162e-27	4.73661e-27	5.85855e-27	6.59104e-27	1.34416e-26	1.19892e-26
527.664	5.54247e-27	4.67923e-27	5.90248e-27	6.71443e-27	1.35575e-26	1.21734e-26
527.74	5.53349e-27	4.68129e-27	5.87082e-27	6.88659e-27	1.3487e-26	1.22766e-26
527.817	5.50259e-27	4.70197e-27	5.81206e-27	6.76247e-27	1.35674e-26	1.2176e-26
527.893	5.48145e-27	4.71451e-27	5.89345e-27	6.75789e-27	1.34602e-26	1.22168e-26
527.969	5.52472e-27	4.67218e-27	5.99916e-27	6.92684e-27	1.35526e-26	1.24246e-26
528.045	5.51109e-27	4.67821e-27	5.9104e-27	6.87627e-27	1.37287e-26	1.22127e-26
528.121	5.44107e-27	4.73269e-27	5.85478e-27	6.84963e-27	1.39689e-26	1.22143e-26
528.198	5.5323e-27	4.64938e-27	5.94201e-27	6.94949e-27	1.41379e-26	1.24996e-26
528.274	5.4998e-27	4.67128e-27	5.99716e-27	7.05057e-27	1.37082e-26	1.24864e-26
528.35	5.49293e-27	4.67162e-27	5.95815e-27	7.06393e-27	1.3644e-26	1.24956e-26
528.426	5.54779e-27	4.62013e-27	5.90623e-27	6.96737e-27	1.38022e-26	1.24945e-26
528.502	5.45956e-27	4.68908e-27	5.95097e-27	6.75579e-27	1.36909e-26	1.21059e-26
528.578	5.48757e-27	4.65973e-27	5.84146e-27	6.66441e-27	1.34719e-26	1.18706e-26
528.655	5.48277e-27	4.65833e-27	5.89668e-27	6.84005e-27	1.35456e-26	1.19457e-26
528.731	5.4873e-27	4.64903e-27	5.86699e-27	6.86559e-27	1.37149e-26	1.20445e-26
528.807	5.54435e-27	4.59594e-27	6.02165e-27	6.94098e-27	1.39641e-26	1.22578e-26
528.883	5.52217e-27	4.60894e-27	6.02039e-27	6.99026e-27	1.38184e-26	1.23621e-26
528.959	5.4764e-27	4.64191e-27	5.87601e-27	6.78628e-27	1.36016e-26	1.19645e-26
529.035	5.54809e-27	4.57673e-27	5.85551e-27	6.96756e-27	1.3886e-26	1.22473e-26
529.111	5.4324e-27	4.66846e-27	5.8677e-27	6.86581e-27	1.39012e-26	1.20924e-26
529.187	5.38176e-27	4.70677e-27	5.87522e-27	6.73711e-27	1.37724e-26	1.20793e-26
529.263	5.46092e-27	4.63326e-27	5.86453e-27	6.82268e-27	1.34112e-26	1.1977e-26
529.34	5.44319e-27	4.64288e-27	5.81567e-27	6.81197e-27	1.31195e-26	1.18863e-26
529.416	5.43688e-27	4.64282e-27	5.85371e-27	7.05811e-27	1.32951e-26	1.20398e-26
529.492	5.47783e-27	4.60281e-27	5.89138e-27	7.05099e-27	1.34435e-26	1.21145e-26
529.568	5.52022e-27	4.56223e-27	5.95985e-27	7.16545e-27	1.39171e-26	1.24465e-26
529.644	5.4519e-27	4.61384e-27	5.88137e-27	7.09983e-27	1.3785e-26	1.22711e-26
529.72	5.48808e-27	4.57815e-27	6.03115e-27	7.18597e-27	1.36356e-26	1.23566e-26
529.796	5.43345e-27	4.61864e-27	6.04783e-27	7.05075e-27	1.33955e-26	1.21428e-26
529.872	5.54628e-27	4.51968e-27	6.06277e-27	7.1732e-27	1.33771e-26	1.22196e-26
529.948	5.34289e-27	4.68578e-27	5.81856e-27	7.08025e-27	1.26433e-26	1.18526e-26
530.024	5.4337e-27	4.60227e-27	5.83556e-27	7.11803e-27	1.24916e-26	1.19928e-26
530.1	5.34466e-27	4.6733e-27	5.76656e-27	6.87603e-27	1.2301e-26	1.16629e-26
530.176	5.3336e-27	4.6775e-27	5.93093e-27	7.18687e-27	1.27204e-26	1.22158e-26
530.252	5.27571e-27	4.72321e-27	5.85171e-27	7.2073e-27	1.27763e-26	1.22141e-26
530.328	5.45035e-27	4.56688e-27	5.87472e-27	7.4821e-27	1.32189e-26	1.25059e-26
530.404	5.29165e-27	4.69803e-27	5.74536e-27	7.38748e-27	1.3208e-26	1.21637e-26
530.48	5.28651e-27	4.69709e-27	5.68161e-27	7.16893e-27	1.2855e-26	1.18939e-26
530.556	5.46134e-27	4.54179e-27	5.95944e-27	7.22796e-27	1.31615e-26	1.22198e-26
530.632	5.44142e-27	4.55306e-27	6.01185e-27	7.51281e-27	1.32986e-26	1.25338e-26
530.707	5.45406e-27	4.53724e-27	5.95489e-27	7.34278e-27	1.30887e-26	1.2292e-26
530.783	5.40927e-27	4.56938e-27	5.88277e-27	7.14167e-27	1.30791e-26	1.20733e-26
530.859	5.38075e-27	4.58819e-27	5.81653e-27	7.16789e-27	1.31371e-26	1.21344e-26
530.935	5.30394e-27	4.64905e-27	5.81489e-27	7.04745e-27	1.2652e-26	1.18078e-26
531.011	5.36487e-27	4.59103e-27	5.85297e-27	7.09039e-27	1.2639e-26	1.17664e-26
531.087	5.25978e-27	4.6771e-27	5.72359e-27	6.8588e-27	1.22782e-26	1.16742e-26
531.163	5.3835e-27	4.56454e-27	5.82505e-27	6.99923e-27	1.25353e-26	1.18378e-26
531.239	5.36485e-27	4.57504e-27	5.84487e-27	6.8656e-27	1.26948e-26	1.19393e-26
531.315	5.43397e-27	4.51175e-27	5.78775e-27	7.14975e-27	1.2956e-26	1.21121e-26
531.391	5.32812e-27	4.59579e-27	5.75971e-27	7.14511e-27	1.28696e-26	1.21138e-26
531.466	5.31287e-27	4.6036e-27	5.83766e-27	7.03942e-27	1.30636e-26	1.2087e-26
531.542	5.31559e-27	4.5959e-27	5.85423e-27	7.04532e-27	1.30883e-26	1.21024e-26
531.618	5.35983e-27	4.55277e-27	5.97644e-27	7.19234e-27	1.31551e-26	1.24712e-26
531.694	5.38537e-27	4.52597e-27	5.93312e-27	7.2773e-27	1.30721e-26	1.25177e-26
531.77	5.26826e-27	4.62096e-27	5.86859e-27	7.2118e-27	1.29017e-26	1.25702e-26
531.846	5.37518e-27	4.524e-27	5.98387e-27	7.1773e-27	1.31707e-26	1.25809e-26
531.921	5.37664e-27	4.51753e-27	5.93013e-27	6.93561e-27	1.30569e-26	1.24197e-26
531.997	5.38922e-27	4.50178e-27	6.11141e-27	7.18603e-27	1.33931e-26	1.26742e-26
532.073	5.32518e-27	4.55049e-27	5.9275e-27	7.44392e-27	1.35528e-26	1.30658e-26
532.149	5.37307e-27	4.50481e-27	5.93762e-27	7.67161e-27	1.38751e-26	1.34484e-26
532.225	5.49295e-27	4.4017e-27	6.02939e-27	7.64225e-27	1.39303e-26	1.35684e-26
532.3	5.37451e-27	4.49318e-27	5.9643e-27	7.34564e-27	1.30112e-26	1.2967e-26
532.376	5.35826e-27	4.50154e-27	5.90081e-27	7.14144e-27	1.28137e-26	1.28305e-26
532.452	5.33291e-27	4.51764e-27	5.97474e-27	7.28718e-27	1.30757e-26	1.30202e-26
532.528	5.34491e-27	4.50231e-27	5.9427e-27	7.42251e-27	1.31865e-26	1.31195e-26
532.604	5.41496e-27	4.43909e-27	5.90024e-27	7.59637e-27	1.35629e-26	1.35018e-26
532.679	5.40145e-27	4.445e-27	5.96774e-27	7.69029e-27	1.34553e-26	1.36632e-26
532.755	5.47805e-27	4.37798e-27	5.88822e-27	7.59815e-27	1.35617e-26	1.38379e-26
532.831	5.39475e-27	4.44022e-27	5.85546e-27	7.40721e-27	1.35138e-26	1.35414e-26
532.906	5.27004e-27	4.53974e-27	5.75118e-27	7.24282e-27	1.3317e-26	1.3344e-26
532.982	5.40112e-27	4.42475e-27	6.01319e-27	7.39201e-27	1.36842e-26	1.38642e-26
533.058	5.39305e-27	4.42622e-27	6.14508e-27	7.31514e-27	1.36759e-26	1.39922e-26
533.134	5.38305e-27	4.4293e-27	6.15252e-27	7.34328e-27	1.3219e-26	1.38986e-26
533.209	5.34663e-27	4.45422e-27	6.08586e-27	7.37751e-27	1.30705e-26	1.39137e-26
533.285	5.29699e-27	4.49065e-27	5.82687e-27	7.24958e-27	1.28491e-26	1.34771e-26
533.361	5.30062e-27	4.48241e-27	5.95521e-27	7.12372e-27	1.2874e-26	1.36382e-26
533.436	5.24158e-27	4.52753e-27	5.86836e-27	7.14159e-27	1.31932e-26	1.37602e-26
533.512	5.41981e-27	4.37401e-27	6.03895e-27	7.31931e-27	1.35095e-26	1.41596e-26
533.588	5.38097e-27	4.40039e-27	6.10459e-27	7.27391e-27	1.37844e-26	1.43704e-26
533.663	5.48758e-27	4.31023e-27	6.08099e-27	7.3264e-27	1.37405e-26	1.4358e-26
533.739	5.27054e-27	4.48197e-27	5.81362e-27	7.10916e-27	1.29453e-26	1.38704e-26
533.815	5.29561e-27	4.45566e-27	5.97797e-27	7.32385e-27	1.29107e-26	1.41498e-26
533.89	5.41032e-27	4.35645e-27	5.9989e-27	7.24907e-27	1.31488e-26	1.4641e-26
533.966	5.28602e-27	4.45343e-27	5.78445e-27	6.88752e-27	1.30298e-26	1.39547e-26
534.041	5.20764e-27	4.51508e-27	5.73017e-27	6.71678e-27	1.23554e-26	1.33921e-26
534.117	5.12685e-27	4.5808e-27	5.77825e-27	6.58746e-27	1.23843e-26	1.35991e-26
534.193	5.22534e-27	4.48945e-27	5.72561e-27	6.64693e-27	1.24259e-26	1.36977e-26
534.268	5.33357e-27	4.39354e-27	5.85918e-27	6.64598e-27	1.23353e-26	1.39171e-26
534.344	5.36983e-27	4.35895e-27	5.88489e-27	6.87156e-27	1.21463e-26	1.41326e-26
534.419	5.2715e-27	4.43489e-27	5.95816e-27	6.80802e-27	1.24598e-26	1.4596e-26
534.495	5.36825e-27	4.3502e-27	6.09099e-27	6.66555e-27	1.27567e-26	1.46926e-26
534.571	5.35937e-27	4.35237e-27	6.06611e-27	6.97442e-27	1.3104e-26	1.52152e-26
534.646	5.2502e-27	4.43749e-27	6.04131e-27	6.73308e-27	1.30019e-26	1.50494e-26
534.722	5.34063e-27	4.35755e-27	6.00477e-27	6.47831e-27	1.30142e-26	1.4896e-26
534.797	5.27266e-27	4.40848e-27	5.87266e-27	6.47458e-27	1.23632e-26	1.45899e-26
534.873	5.29733e-27	4.38296e-27	5.89207e-27	6.49646e-27	1.2468e-26	1.49961e-26
534.948	5.34821e-27	4.33641e-27	5.86626e-27	6.67588e-27	1.26397e-26	1.52828e-26
535.024	5.30698e-27	4.36497e-27	5.8889e-27	6.65444e-27	1.27815e-26	1.54561e-26
